# Supplementary material
Source: publisher figshare collection journal article supplement (https://acs.figshare.com/ndownloader/files/5063146)
Supplement: Supplementary file 1 [file 5063146]

Supporting information

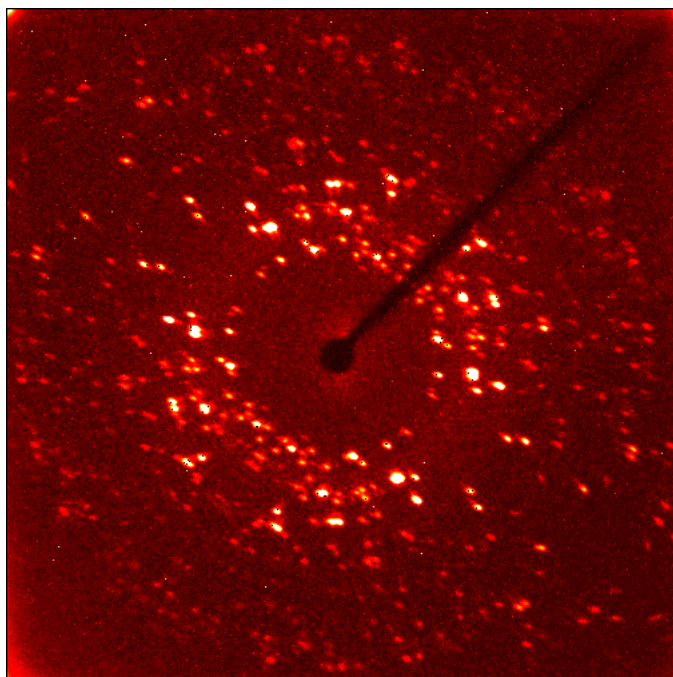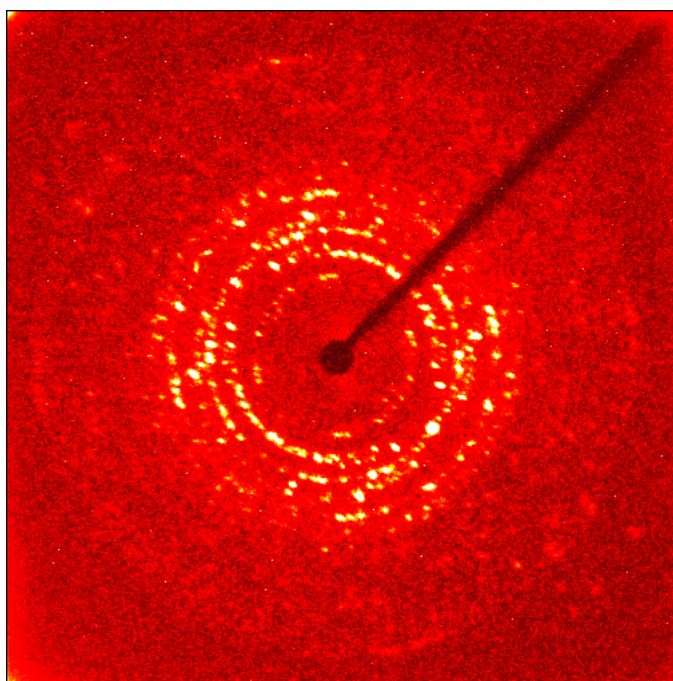

**Figures S1a and S1b: Rotation photographs taken on the solid sample of a) 4FA b) 2FA.**

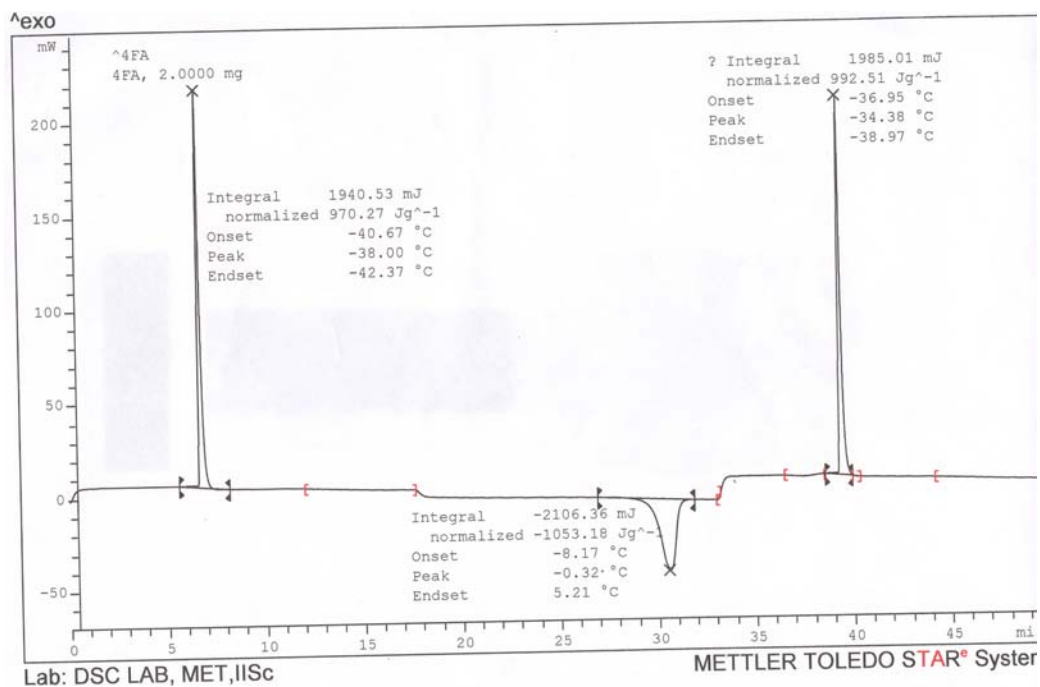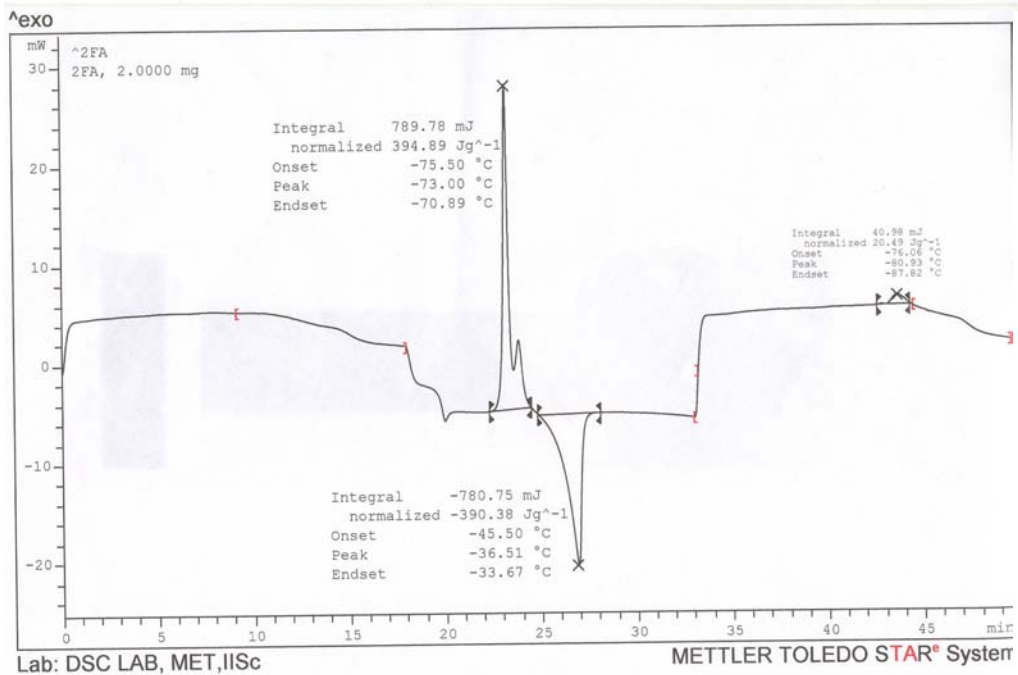

**Figures S2a and S2b: DSC traces of a) 4FA and b) 2FA done in inert nitrogen atmosphere at 10°C/min.**

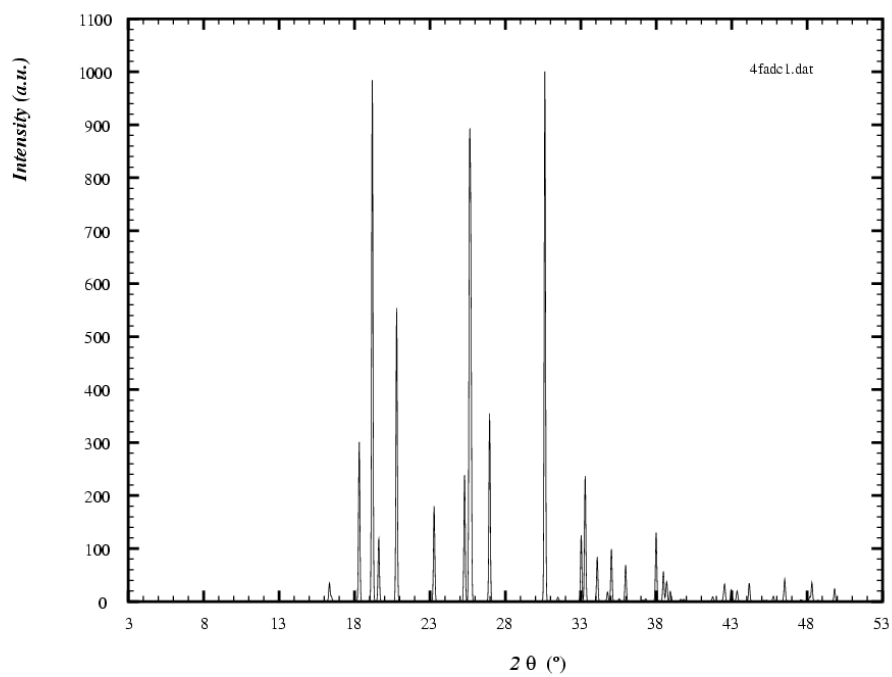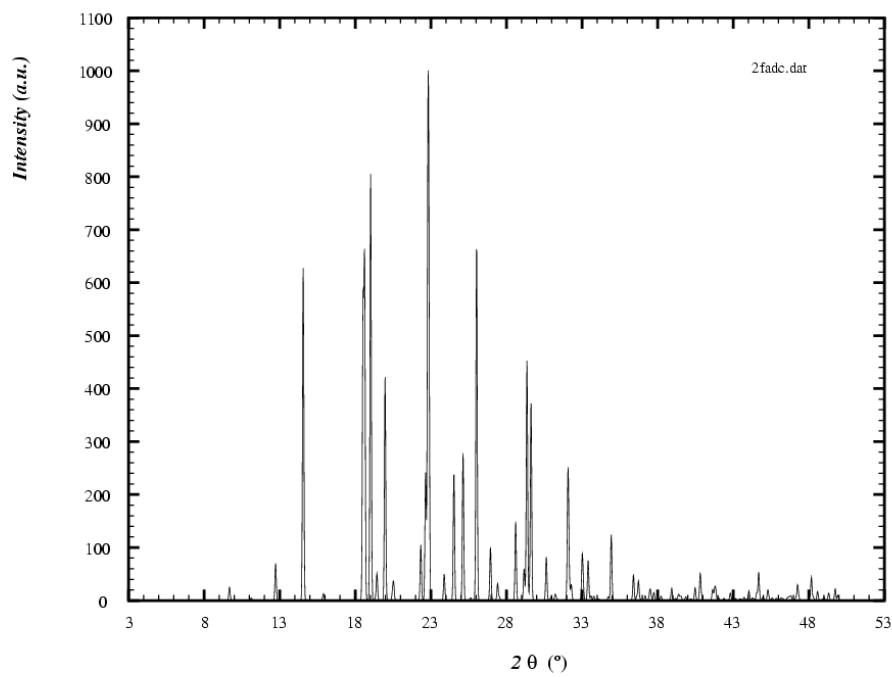

**Figures S3a and S3b: Simulate Powder Diffraction patterns for a) 4FA and b) 2FA.**
